# Supplementary material for: Sustained Axonal Degeneration in Prolonged Disorders of Consciousness
Source: MDPI journal article supplement (doi:10.3390/brainsci11081068), 2021-08-14
Supplement: s1 [file s1]

**Supplementary Table S1. Patients' demographic and clinical details.**

| Pt | Sex | Age (y) | Brain injury | Time since<br>brain injury (days) | DOC | CRS-R score | Main CT and / or MRI findings*                                                |
|----|-----|---------|--------------|-----------------------------------|-----|-------------|-------------------------------------------------------------------------------|
| 1  | M   | 37      | HIBI         | 65                                | UWS | 3           | Bi-hemispheric hypodensity                                                    |
| 2  | M   | 65.4    | HIBI         | 46                                | UWS | 2           | None                                                                          |
| 3  | M   | 56.4    | TBI          | 46                                | MCS | 7           | Left hemispheric subdural hematoma                                            |
| 4  | M   | 19      | TBI          | 30                                | UWS | 5           | Diffuse axonal injury; cerebral edema                                         |
| 5  | M   | 42.8    | TBI          | 33                                | MCS | 18          | Diffuse axonal injury                                                         |
| 6  | M   | 24.3    | HIBI         | 64                                | UWS | 6           | None                                                                          |
| 7  | F   | 34.8    | HIBI         | 37                                | UWS | 4           | None                                                                          |
| 8  | M   | 29.5    | TBI          | 30                                | MCS | 10          | Left hemispheric epidural hematoma                                            |
| 9  | F   | 18.8    | TBI          | 57                                | MCS | 18          | Left frontal epidural and subdural hematoma; cerebral edema                   |
| 10 | M   | 26      | TBI          | 43                                | MCS | 15          | Right fronto-temporal cortical contusions                                     |
| 11 | M   | 20.4    | TBI          | 90                                | UWS | 4           | Right frontal epidural hematoma; multiple cortical contusions; cerebral edema |
| 12 | F   | 30.4    | TBI          | 47                                | UWS | 6           | Diffuse axonal injury                                                         |
| 13 | M   | 29.8    | TBI          | 49                                | MCS | 11          | Bilateral frontal cortical contusions; cerebral edema                         |
| 14 | M   | 39.7    | TBI          | 38                                | MCS | 8           | Right temporo-parietal epidural hematoma                                      |
| 15 | M   | 22.9    | TBI          | 30                                | MCS | 8           | Multiple cortical contusions; intraventricular hemorrhage                     |
| 16 | M   | 22.5    | TBI          | 16                                | UWS | 3           | Left hemispheric epidural hematoma; ischemic lesions in the brainstem         |
| 17 | M   | 46.1    | TBI          | 58                                | UWS | 2           | Bi-hemispheric epidural hematoma; diffuse axonal injury                       |
| 18 | M   | 27.7    | TBI          | 33                                | MCS | 14          | Diffuse axonal injury                                                         |
| 19 | M   | 17.8    | TBI          | 33                                | MCS | 12          | Left lenticular nucleus hemorrhage                                            |
| 20 | M   | 22.1    | TBI          | 35                                | MCS | 14          | Right hemispheric epidural and subdural hematoma                              |
| 21 | M   | 51.1    | TBI          | 42                                | UWS | 2           | Diffuse axonal injury                                                         |
| 22 | M   | 43.7    | HIBI         | 30                                | UWS | 5           | Bilateral hypoxic lesions in the occipital cortex, thalamus and hippocampus   |
| 23 | M   | 18.7    | TBI          | 40                                | UWS | 5           | Multiple cortical contusions; cerebral edema                                  |
| 24 | M   | 34.1    | HIBI         | 65                                | UWS | 2           | Cerebral edema                                                                |
| 25 | M   | 18.2    | TBI          | 52                                | MCS | 18          | Bilateral frontal subdural hematoma                                           |
| 26 | M   | 60.9    | TBI          | 24                                | UWS | 2           | Right hemispheric epidural hematoma                                           |
| 27 | M   | 24.2    | HIBI         | 40                                | UWS | 3           | Bi-hemispheric hypodensity; cerebral edema                                    |
| 28 | M   | 58.3    | TBI          | 21                                | UWS | 6           | Left hemispheric epidural hematoma; right hemispheric subdural hematoma       |
| 29 | M   | 49      | TBI          | 28                                | UWS | 6           | Bilateral frontal intraparenchymal hemorrhage                                 |
| 30 | M   | 42.4    | TBI          | 32                                | UWS | 4           | Left lenticular nucleus hemorrhage; multiple cortical contusions              |
| 31 | M   | 18.1    | TBI          | 42                                | MCS | 6           | Diffuse axonal injury                                                         |
| 32 | M   | 48.2    | HIBI         | 29                                | UWS | 5           | Cerebral edema                                                                |
| 33 | M   | 58.6    | TBI          | 70                                | UWS | 4           | Right hemispheric subdural hematoma                                           |
| 34 | M   | 33.3    | TBI          | 25                                | UWS | 2           | Diffuse axonal injury                                                         |
| 35 | M   | 24.2    | HIBI         | 39                                | UWS | 6           | Cerebral edema                                                                |
| 36 | M   | 19.1    | HIBI         | 50                                | UWS | 4           | Cerebral edema                                                                |
| 37 | M   | 63.4    | HIBI         | 19                                | UWS | 4           | None                                                                          |
| 38 | M   | 38.4    | TBI          | 90                                | UWS | 7           | Multiple cerebral and cerebellar contusions                                   |

|    |   |      |      |    |     |    |                                                                                    |
|----|---|------|------|----|-----|----|------------------------------------------------------------------------------------|
| 39 | F | 40.1 | TBI  | 38 | UWS | 3  | Intraventricular hemorrhage                                                        |
| 40 | M | 48.6 | HIBI | 87 | UWS | 8  | Cerebral edema                                                                     |
| 41 | M | 51.4 | HIBI | 90 | MCS | 10 | Cerebral edema                                                                     |
| 42 | M | 52.1 | TBI  | 79 | MCS | 12 | Bilateral hemispheric subarachnoid hemorrhage; right hemispheric epidural hematoma |
| 43 | F | 64.6 | TBI  | 71 | MCS | 13 | Left hemispheric subdural hematoma                                                 |
| 44 | F | 55.4 | TBI  | 50 | MCS | 12 | Bilateral hemispheric subarachnoid hemorrhage; cerebral edema                      |
| 45 | M | 20.6 | TBI  | 59 | UWS | 7  | Right hemispheric subdural hematoma                                                |
| 46 | F | 64   | HIBI | 24 | UWS | 5  | None                                                                               |
| 47 | M | 56.8 | HIBI | 84 | UWS | 6  | Hypoxic white matter lesions                                                       |
| 48 | M | 64   | TBI  | 74 | UWS | 3  | Bilateral hemispheric subarachnoid hemorrhage                                      |
| 49 | F | 45.5 | HIBI | 45 | UWS | 4  | None                                                                               |
| 50 | M | 53.6 | TBI  | 43 | UWS | 2  | Bilateral hemispheric subarachnoid hemorrhage                                      |
| 51 | M | 45.0 | TBI  | 33 | UWS | 2  | Right hemispheric cortical contusions                                              |
| 52 | M | 53.8 | HIBI | 58 | UWS | 4  | Cerebral edema                                                                     |
| 53 | M | 22.2 | TBI  | 73 | MCS | 14 | Right frontal intraparenchymal hemorrhage                                          |
| 54 | M | 49   | TBI  | 37 | UWS | 6  | Bilateral cortical contusions                                                      |
| 55 | F | 63.8 | HIBI | 23 | UWS | 5  | None                                                                               |
| 56 | M | 38.3 | HIBI | 13 | MCS | 5  | None                                                                               |
| 57 | M | 37.9 | TBI  | 36 | UWS | 4  | Diffuse axonal injury                                                              |
| 58 | M | 42.9 | TBI  | 54 | UWS | 3  | Brainstem and thalamic hemorrhage; intraventricular hemorrhage                     |
| 59 | M | 36.4 | TBI  | 89 | MCS | 12 | Left hemispheric epidural hematoma; subarachnoid hemorrhage                        |
| 60 | M | 32.1 | HIBI | 31 | UWS | 5  | Hypoxic white matter lesions                                                       |
| 61 | M | 28.9 | TBI  | 29 | UWS | 2  | Left hemispheric subdural hematoma in the                                          |
| 62 | M | 34.1 | TBI  | 72 | UWS | 6  | Diffuse axonal injury; bilateral cortical contusions                               |
| 63 | M | 28   | TBI  | 55 | MCS | 13 | Cerebral edema                                                                     |
| 64 | F | 40.4 | TBI  | 65 | MCS | 10 | Diffuse axonal injury                                                              |
| 65 | M | 27.7 | TBI  | 69 | MCS | 12 | Diffuse axonal injury                                                              |
| 66 | M | 18.7 | TBI  | 30 | UWS | 5  | Diffuse axonal injury                                                              |
| 67 | F | 30.1 | TBI  | 30 | MCS | 18 | Diffuse axonal injury; right hemispheric cortical contusions                       |
| 68 | M | 52.3 | HIBI | 49 | UWS | 6  | Bilateral cortical laminar necrosis                                                |
| 69 | F | 43.6 | HIBI | 40 | UWS | 4  | None                                                                               |
| 70 | M | 65   | TBI  | 62 | MCS | 19 | Right frontal intraparenchymal hemorrhage                                          |

\* When available, the data are from immediately after brain injury; otherwise, the first data available is shown.

CRS-R, Coma Recovery Scale–Revised; CT, computed tomography; DOC, disorder of consciousness; F, female; HIBI, hypoxic-ischemic brain injury; M, male; MCS, minimally conscious state; MRI, magnetic resonance imaging; Pt, patient; TBI, traumatic brain injury; UWS, unresponsive wakefulness syndrome.
